# Supplementary material for: Determination of the loading and stability of Pd in an arborescent copolymer in ethanol by microplasma-optical emission spectrometry
Source: Royal Society of Chemistry journal article supplement (doi:10.1039/c3ra46232c), 2014-01-01
Supplement: c3ra46232c.pdf [file c3ra46232c.pdf]

## Supplementary Data – RSC Advances

### Determination of the loading and stability of Pd in an arborescent copolymer in ethanol by microplasma-optical emission spectrometry

Olivier Nguon, Mario Gauthier\*, Vassili Karanassios

*Waterloo Institute for Nanotechnology, Department of Chemistry, University of Waterloo, Waterloo, ON, N2L 3G1 Canada.*

\*Corresponding author. Tel.: +1 519 888-4567 ext. 35205; Fax: +1 519 746-0435.

E-mail address: gauthier@uwaterloo.ca

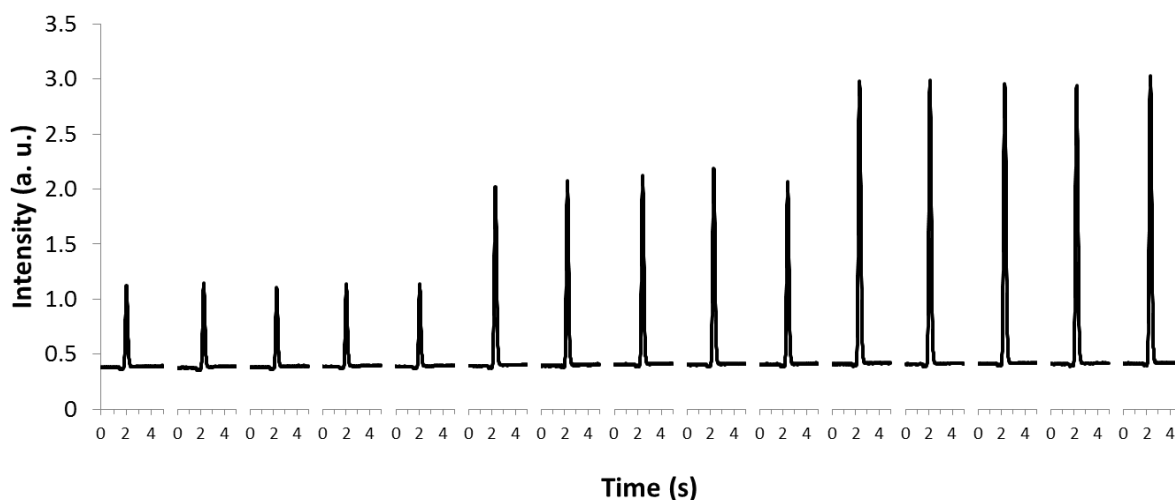

**Figure S1:** Examples of analyte emission signals acquired with the microplasma device over 5 successive runs using a Pd standard solution in water and injection volumes of 3.0, 6.0 and 10.0  $\mu\text{L}$ , respectively. The precision of the signals, and the stability of intra-day microplasma background optical emission are noteworthy. Even though the microplasma was operated continuously for more than 10 hours for these experiments, only a small fraction of the analytical runs performed during this time period has been included above.

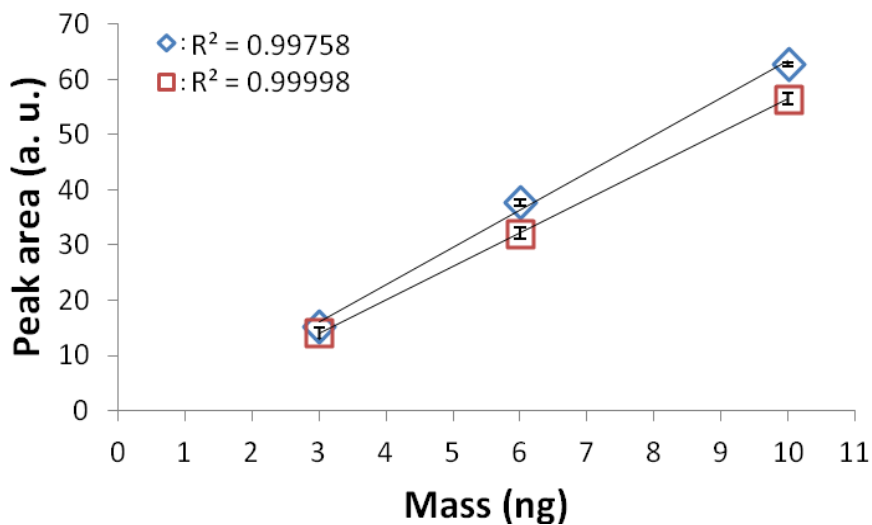

**Figure S2:** (color online). Calibration curves for Pd standard solutions in a) water (blue diamonds) and b) ethanol (red squares).

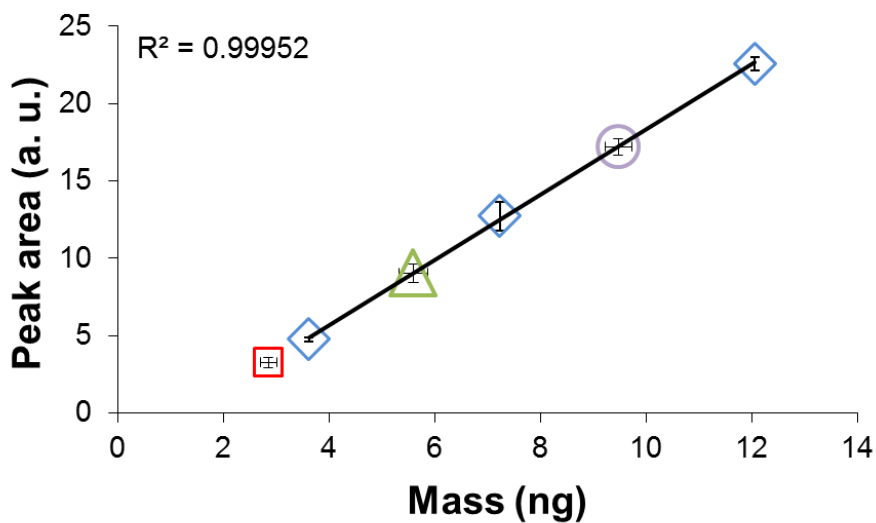

**Figure S3:** (color online). Calibration curve for Pd in a solution of  $G1\text{-Pd}(\text{OAc})_2[0.25 \text{ equiv}]$  in ethanol (blue diamonds), and analysis of dialyzed sample  $G1\text{-Pd}(\text{OAc})_2$  using injection volumes of 3.0  $\mu\text{L}$  (red square), 6.0  $\mu\text{L}$  (green triangle) and 10.0  $\mu\text{L}$  (purple circle).

**Table S1:** Precision<sup>a</sup> and detection limit<sup>b</sup> for solutions of Pd-Std in water and ethanol, and G1-Pd(OAc)<sub>2</sub> in ethanol, determined for a Pd mass ranging from 3-10 ng.

| Injection volume (μL) | Pd-Std in Water  |                      | Pd-Std in EtOH   |                      | G1-Pd(OAc) <sub>2</sub> in EtOH |                      |
|-----------------------|------------------|----------------------|------------------|----------------------|---------------------------------|----------------------|
|                       | Precision (%RSD) | Detection limit (pg) | Precision (%RSD) | Detection limit (pg) | Precision (%RSD)                | Detection limit (pg) |
| 3.0                   | 0.1              | 33                   | 7.4              | 62                   | 3.8                             | 28                   |
| 6.0                   | 1.7              | 16                   | 5.7              | 62                   | 1.3                             | 29                   |
| 10.0                  | 0.5              | 44                   | 0.7              | 65                   | 2.1                             | 26                   |
| Average <sup>c</sup>  |                  | 31 ± 14              |                  | 63 ± 2               |                                 | 28 ± 2               |

<sup>a</sup> The precision was determined in terms of the peak area percent relative standard deviation (%RSD), and is the average of at least 3 measurements. <sup>b</sup> The detection limit was estimated using the 3σ criterion, and from a minimum of 3 measurements. <sup>c</sup> Average and standard deviation for all the injection volumes, determined from a minimum of 9 measurements.

**Table S2:** Pd quantification with 3, 6 and 10 μL injection volumes for solutions prepared with 1.5 molar equivalent of Pd per 2VP units (G1-Pd[100 mol %]).

| Injection volume (μL) | Calculated Pd Mass (ng) <sup>a</sup> | Pd Attached (mol %) <sup>b</sup> | Calculated Pd/2VP (mol %) | Precision (%RSD) <sup>c</sup> |
|-----------------------|--------------------------------------|----------------------------------|---------------------------|-------------------------------|
| 3.0                   | 2.12                                 | 66.1                             | 98.4                      | 2.3                           |
| 6.0                   | 4.09                                 | 64.6                             | 96.3                      | 3.3                           |
| 10.0                  | 7.42                                 | 69.7                             | 103.9                     | 3.0                           |
| Average <sup>d</sup>  |                                      | 66.8 ± 2.8                       | 99.5 ± 4.2                |                               |

<sup>a</sup> Mass measured with the microplasma-OES instrument, obtained from a minimum of 3 measurements. <sup>b</sup> Mole percent of Pd remaining after dialysis. <sup>c</sup> The precision is expressed in terms of the percent relative standard deviation, in relation to the mol % of Pd/2VP. <sup>d</sup> Average and standard deviation for all the injection volumes, determined from a minimum of 9 measurements. Based on pooled standard deviation and a t-test, it was found statistically valid (at the 95% confidence level) to retain the Pd mass (ng) determined using 3 μL volumes despite the slight extrapolation of the calibration curve to lower concentrations.

**Table S3:** Pd quantification with 3, 6 and 10 μL injection volumes for solutions prepared with 0.25 molar equivalent of Pd per 2VP units (G1-Pd[24 mol %]).

| Injection volume (μL) | Calculated Pd Mass (ng) <sup>a</sup> | Pd attached (mol %) <sup>b</sup> | Calculated Pd/2VP (mol %) | Precision (%RSD) <sup>c</sup> |
|-----------------------|--------------------------------------|----------------------------------|---------------------------|-------------------------------|
| 3.0                   | 2.85                                 | 93.9                             | 23.8                      | 5.4                           |
| 6.0                   | 5.59                                 | 92.1                             | 23.4                      | 4.9                           |
| 10.0                  | 9.47                                 | 93.6                             | 23.7                      | 2.7                           |
| Average <sup>d</sup>  |                                      | 93.3 ± 3.7                       | 23.7 ± 0.9                |                               |

<sup>a</sup> Mass measured with the microplasma-OES instrument, obtained from a minimum of 3 measurements. <sup>b</sup> Mole percent of Pd remaining after dialysis. <sup>c</sup> The precision is expressed in terms of the percent relative standard deviation, in relation to the mol % of Pd/2VP. <sup>d</sup> Average and standard deviation for all the injection volumes, determined from at least 9 measurements. The Pd mass (ng) determined from 3 μL was retained despite the slight extrapolation of the calibration curve (based on statistical tests detailed in the caption of Table S2).

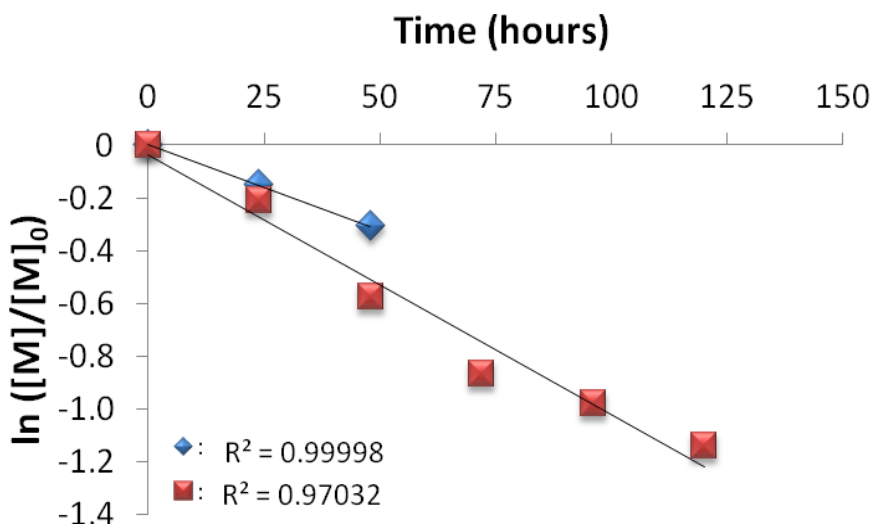

**Figure S4:** (color online). Graphical analysis of the first-order rate of aggregation of Pd(OAc)<sub>2</sub> in ethanol (red squares), and Pd in a standard solution in water (blue diamonds).

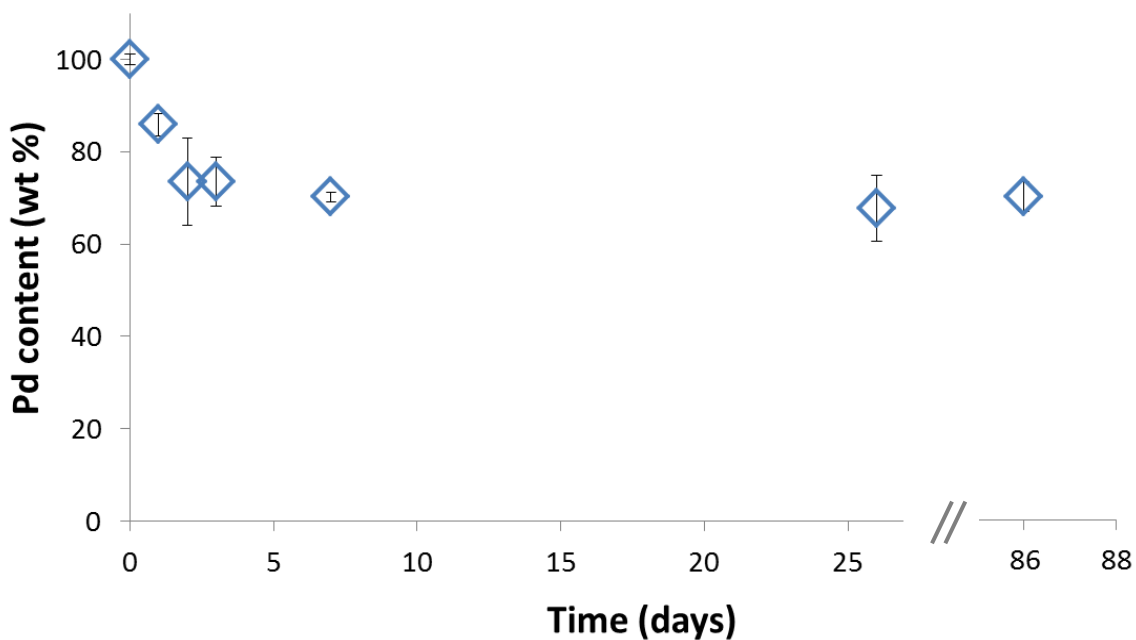

**Figure S5:** (color online). Change of the mass concentration of Pd in a standard solution in water as measured by microplasma-optical emission spectrometry.
